# Supplementary material for: Recrudescence Mechanisms and Gene Expression Profile of the Reproductive Tracts from Chickens during the Molting Period
Source: PubMed Central journal article supplement (PMC3788108; doi:10.1371/journal.pone.0076784), 2013-10-01
Supplement: pone.0076784.s001.pdf [file pone.0076784.s001.pdf]

Table S1. Functional categorization of genes changed in the magnum between day 0 and day 6 during the molting period.

| Category | Day 0 vs. Day 6 | Molecules                                                                                                                                                                                                                                                                                                                                                                                                                                                                                                                                                                                                                                                                                                                                                                                                                                                                                                                                                                                                                                                                                                                 | p-value     |
|----------|-----------------|---------------------------------------------------------------------------------------------------------------------------------------------------------------------------------------------------------------------------------------------------------------------------------------------------------------------------------------------------------------------------------------------------------------------------------------------------------------------------------------------------------------------------------------------------------------------------------------------------------------------------------------------------------------------------------------------------------------------------------------------------------------------------------------------------------------------------------------------------------------------------------------------------------------------------------------------------------------------------------------------------------------------------------------------------------------------------------------------------------------------------|-------------|
| up       |                 | SLC5A1,F2,SRC,NPY,ATP2B2,KNG1,MAPK8,TFF3,IL6,MME,CA2,SLC4A2,CAPN2,AQP3,SLIT3,ATP2B4,PTGDS,SELP,RB1,MTOR,TF,CAV1,CAMK4,HSP90B1,TACR1,AQP5,HSPA5,DUSP6,COL2A1,BDNF,ALOX5,NTF3,DUSP1,NR4A3,BNIP3,UTS2,INSR,IAPP,STX1A,ADORA1,CA4,APOA4,HYOU1,ID1,RGS4,PPARD,PTGS1,ANK2,P4HB,FSHR,NRG1,PTH1R,HOMER1,ADORA2A,CNR1,CA9,GADD45B,SKP2,NCOA3,APOD,RARRES2,NCS1,CYP7A1,MMP1,TGFB3,XBP1,PRDX6,PGGT1B,GJB1,LTF,ACE,PRLR,ENPP2,S1PR5,MSI1,STK11,GNAI1,ERP44,LYZ,SFTP A1,ADA,ACTG2,MUC1,GCH1,FABP3,SFRP4,EEF1A1,BMP2,GADD45G,PRKAR2B,STK17A,PRDX5,CTH,HOMER2,PROKR2,RCAN1,ENPEP,OGDH,PDCD1,PRDX4,BECN1,Sprr1a,TEC,RHOB,RRM2B,XPO1,UCHL1,MAOB,PHB,GAB2,GFI1B,MYCN,STEAP3,MKL1,AMD1,STK25,TNFRSF6B,PEMT,PTN,CHIA,MITF,EPHX1,AMH,GREM1,HHAT,FKBP5,SLCO2A1,PLK3,NID1,NOV,PAEP,SNCA,DHCR24,NFIL3,ETV4,HERPUD1,DAG1,SOX7,RPS27L,RPLP0,SEPP1,BHLHA15,EPSS8,CREB3L2,ASNS,RDX,SGCG,PELP1,POLH,FERMT2,NRCAM,GPR87,DEFB1,PDIA3,NDC80,RCAN2,SEMA3C,CACNA2D2,ADCY10,NRG2,CRMP1,APLP2,PSME3,GPR37,CNTN2,MTMR9,TPD52,NUTF2,GRM7,PES1,DNAJB9,CREB3,DAB2IP,MRAS,RDH12,SCN3B,RASSF6,MIB2,DNAJB11,ALG3,MFF,SERPINB3,PSPH,NARS,DPYSL4,CA6,ITPK1,NAIF1,CHAC1 | 9.12708E-08 |

Apoptosis

down

CEBPB,EGFR,ETV7,GJA1,STMN1,SLC9A3R1,VCAM1,TNFRSF1B,NFKBIA,MMP2,CASP3,HIF1A,IGF2,MYC,IGF2R,PXN,KCNQ1,CDH1,GNAI2,NOS2,P2RX7,CD8A,CALD1,PTGS2,PRKCB,SAT1,FAS,MAPK11,BID,CASP1,CASP2,CASP7,ITGB2,APP,CXCR4,CTGF,ST14,CCNE1,PLAU,F,OXO1,VTN,LPAR2,PTTG1,CXCL12,P2RY6,PLK1,ITPR1,APOA1,SPP1,MMP9,CDKN1A,DDIT3,SPI1,BCAR1,CD4,CDK1,EGR1,PLA2G4A,EIF2,AK2,NDRG1,TNFSF10,NOL3,C5,BSG,DPP4,TBP,PDCD4,CYBB,JAG1,RAC2,CD36,NOTCH1,CCL4,CHEK2,CDK6,ATR,PTPRC,NEDD4L,TLR2,MKI67,IL15,INHBA,NFE2L2,STAT3,PTPN13,POLG,POSTN,CD44,CTSK,APAF1,ARG2,CSK,NPM1,MTCH1,ITGA4,LAMA4,RASA1,MDM2,PIK3R1,WNT5A,NPPC,IRF1,GDF9,MLL,BMP2,PRNP,REL,LDHA,HSD11B1,SOCS1,PYCARD,CTSD,MYD88,COMP,CD38,SCARB1,RNF34,CTSB,RORA,PLIN2,OGT,DFFB,SREBF1,CEL,IL22,FOLR1,F3,CELF2,VCAN,C4orf14,SERPINA1,COL18A1,MGLL,CLDN5,SOAT1,MMP7,SOCS3,IL4R,PLTP,ID2,FGF1,MMP1,CDKN2A,AHR,LGALS1,XRCC6,TSC1,C3,IGFBP2,HDAC5,MCL1,TTR,MAPK9,ATRX,GLS,FASN,FGFR3,FYN,SMAD7,IFT88,SDC1,BCL2A1,TRPC3,TNS1,SFTPA1,NCF2,ECE1,CPE,MERTK,FAAH,NRP1,TLR3,RNASEL,NR1H3,IL1R1,TRPV6,NCOA2,FGFR2,PERP,KLF6,CUX1,TNFRSF18,AHSG,GLUL,MMP13,MGP,CCL17,MAFB,HSPG2,LGALS3,CFH,HPSE,ANXA2,PKD2,GAB1,TFPI,PTPN6,P2RX4,ZYX,FTH1,SLC31A1,CSF1R,EEF1A1,ACSL4,IL16,HSPE1,LTA4H,CD274,C1QA,RPL18A,TRERF1,WNT4,IFIH1,GAS6,C3AR1,NCOA1,CHRNA7,TXNRD2,MTHFR,ITGAV,EHF,FIGF,GPRC5A,UNC5B,C4BPA,SNAI1,CCL1,TNFSF13B,PDE3B,LAMP2,SLC6A2,TCIRG1,RGN,MRE11A,TICAM1,SLC6A6,CD82,HSP90AB1,TYMS,MST1,SLURP1,F8,CXADR,CTSS,BCL6,BTK,SERPINI1,BPI,GFRA1,PIK3CD,SPRY2,SOX4,CD83,RBL2,IRF8,XRCC5,LAMC1,CADM1,MGMT,IKZF1,CCL19,POLB,DAPK1,DNASE1L3,TSC22D3,ALDH1A2,B2M,MSH6,CDC20,PDE1A,SCIN,MEOX2,MFGE8,CDH11,IRF4,TCF3,DKC1,MCM5,MX1,ARHGDI1,PRKCH,RAD54L,TRAF6,GLI3,PTMA,MGAT3,CDC45,CD79B,ICMT,MVP,MTUS1,EPB41L3,CABC1,NCF4,STK4,TRPV2,NME1,TERF1,PML,PRKDC,CTCF,RAD50,GZMA,ID3,CDC14A,TFDP1,LIG4,BRD2,TAP1,CD81,CCNG1,CD247,DIAPH1,DUSP5,ROBO1,SFRP1,SMAD6,NF1,TIAL1,REV3L,GMNN,PIAS1,NCOR1,MLF1,MAP3K8,ATG7,IFT57,TRA@,CDT1,TNFAIP3,AKAP1,IFNAR1,TRIM24,FCER1G,GIMAP5,TPX2,M6PR,CD200,BHLHE40,HEY1,PDE4B,SUZ12,RAD9A,TOP2A,TRAF5,CAMKK2,DYNLT1,TGS1,UNG,BARD1,ITGB5,CD3E,FANCL,ALOX5AP,TWIST1,POT1,KLF10,STAG1,RIN2,CD74,MYCBP2,ITGB4,TNIP2,SH3KBP1,ELAC2,SRGN,FES,POU2AF1,SEPP1,LY6E,ZBTB17,REV1,GAS2,UGCG,TSC22D1,ULK1,USP18,USP28,GSG2,AGPAT2,SGMS1,HDAC4,NR2C2,SMYD3,PTPRF,ING2,SMARCAL1,NUMB,MARCKSL1,TES,HNRNPU,ORC2L,RXFP1,FOXG1,KLF11,ZEB1,RUVBL1,PPAP2B,HEXIM1,LGMN,TNFRSF21,KDM3A,DNAJA3,PAQR3,CDCA8,IFI27,PPP2R5A,MID1,HSF2,SEMA5A,PLEKHO1,RAD51L1,RANBP9,FBLN1,T,KIF23,TASP1,TWIST2,HOPX,PTP4A1,CSTA,RRM1,CTSL2,DPYD,EPHB3,JDP2,SLC16A2,TUB,RNASEH1,NEK1,SULF1,SEC14L2,PPP2R4,ORC1L,GSTO1,SGPP1,SMC6,MAP3K2,MBD4,SYNGAP1,QKI,SAP30,SIRT4,PHLPP1,HYAL1,NAV3,PLSCR3,BASP1,PIK3IP1,PACS2,CXXC1,KIF4A,AMOT,TIMM44,OSGIN1,E4F1,SGK3,CNKSRI, CDC34,S100A6,SRPK2,PSAP,GULP1,SUPT5H,RBBP7,CD3D,ING3,HIPK3,COX10,RRM2,IP6K2,CAMKK1,AATF,NSMCE2,PDCD10,LAMA3,FHOD1,MTMR9,ELF3,EEF1A2,DDX47,CREG1,FLNB,RPAP3,ZBTB38,ITPR3,NELL1,RHOBTB2,CHD1L,ZNF217,RBM5,LSP1,LZTR1,SDPR,DYRK2,UNC5C,GPR56,EFEMP1,SMPD3,SESN1,WISP3,AKR1B10,UNC119,ASAH1,FAIM,RFXANK,SPTBN1,SCARB2,ITGB3BP,CABIN1,TTC6,HAUS1,COQ2,LPCAT3,ELOVL5,DPYSL3,ARHGFE6,ARL6IP1,PIK3C2A,VPS53,TXNDC17,IRG1,PDCD6,HECW1,IGHMBP2,STK39,SENP1,MAGI2,CIRBP,TIMD4,MAP3K14,MYCT1,FZD8,PUS10,DUSP26,DNAJC12,TNIP1,LCMT1,PRIM1,ENOPH1,RPL18,FLII,P2RY13,HDAC10,LRIG3,EFHC1,IQCG,C2orf49,LITAF,C1QB,LYRM1,SUPV3L1,SPATA17,Wdr35L,TRIM69,LAPTM5,FAM129A,PRR5,RAB36,SRBD1,C7orf27,RABL3,TBC1D19

3.58E-30

up

F2, SRC, NPY, KNG1, MAPK8, TFF3, IL6, MME, SLC4A1, CAPN2, AQP3, ATP2B4, PTGDS, SELP, RB1, MTOR, TF, CAV1, CAMK4, HSP90B1, LPAR3, TA  
CR1, AQP5, HSPA5, DUSP6, COL2A1, BDNF, ALOX5, NTF3, DUSP1, CSRP2, NR4A3, UTS2, INSR, IAPP, ADORA1, ID1, RGS4, PPARD, PTGS1, ANK2,  
FSHR, NRG1, PTH1R, ADORA2A, CNR1, CA9, GADD45B, SKP2, NCOA3, APOD, CYP7A1, MMP1, TGFB3, XBP1, PRDX6, PGGT1B, GJB1, LTF, PLCD1  
, ACE, PRLR, ENPP2, S1PR5, MSI1, STK11, GNAI1, LYZ, SFTPA1, ADA, ACTG2, MUC1, GNMT, GCH1, FABP3, KCNK1, OXTR, MMP12, NUCB2, SFRP4,  
ASPH, EEF1A1, BMPR2, GADD45G, PRKAR2B, HOMER2, ADSL, RCAN1, ENPEP, PDCD1, PRDX4, BECN1, TEC, RHOB, XPO1, UCHL1, PHB, GAB2,  
GFI1B, MOG, MYCN, MKL1, CSF3R, AMD1, STK25, TNFRSF6B, HDGFRP3, PEMT, PTN, MITF, PLXNA1, AMH, GREM1, SMARCD3, RAB3B, FKBP5, PL  
K3, NID1, NOV, PAEP, SNCA, SILV, NFIL3, MCM6, ETV4, DAG1, SOX7, CACNA1G, BHLHA15, P2RX5, HPX, EPS8, CREB3L2, LRRC3B, ASNS, SUFU, F  
GF19, POLR2G, RDX, PELP1, POLH, NDEL1, MFI2, NRCAM, UAP1, WNT5B, SH2D2A, GPR87, C8orf4, DEFB1, MYST4, NPDC1, TNN, NDC80, PRDM16  
, CCR4, RCAN2, SEMA3C, CACNA2D2, CRKL, PKP2, QSOX1, NELF, NRG2, APLP2, PSME3, MCF2, CDK8, COL8A1, PPP2R3A, RRBP1, POU6F1, FZD  
5, IL1RL1, TPD52, NUTF2, NEK8, PES1, CTHRC1, CREB3, ZNF384, LTBP3, BAALC, BCAT1, MCF2L, Kng1, ALDH18A1, KRT20, PSPH, NARS, PLXDC1

2.1862E-07

Proliferation

down

CEBPB,EGFR,ETV7,GJA1,STMN1,SLC9A3R1,VCAM1,TNFRSF1B,NFKBIA,MMP2,CASP3,CTTN,HIF1A,IGF2,MYC,IGF2R,PXN,KCNQ1,SLC9A3R2,CDH1,GNAI2,NOS2,P2RX7,CD8A,CALD1,PTGS2,PRKCB,SAT1,FAS,MAPK11,BID,CASP1,ITGB2,APP,CXCR4,CTGF,CCNE1,PLAU,FOXO1,VTN,LPAR2,PTTG1,CXCL12,P2RY6,PLK1,ITPR1,APOA1,SPP1,MMP9,CDKN1A,DDIT3,SPI1,BCAR1,CD4,CDK1,EGR1,PLA2G4A,EIF2AK2,CCL20,CCR2,NDRG1,TNFSF10,C5,BSG,DPP4,TBP,PDCD4,CYBB,JAG1,RAC2,CD36,NOTCH1,CCL4,CHEK2,CDK6,ATR,PTPRC,TLR2,MKI67,IL15,INHBA,NFE2L2,STAT3,PTPN13,POSTN,CD44,CTSK,ARG2,CSK,NPM1,ITGA4,LAMA4,RASA1,MDM2,PRKD2,PIK3R1,WNT5A,NPPC,IRF1,GDF9,MLL,BMP2,PRNP,REL,LDHA,HSD11B1,SOCS1,PYCARD,CTSD,MYD88,COMP,CD38,SCARB1,RNF34,CTSB,RORA,SREBF1,CEL,IL22,FOLR1,F3,CELF2,VCAN,SERPINA1,COL18A1,MMP7,CELF1,SOCS3,IL4R,ID2,FGF1,FRK,MMP1,CDKN2A,AHR,LGALS1,XRCC6,TSC1,C3,IGFBP2,MCL1,TTR,MAPK9,GLS,FASN,FGFR3,FYN,SMAD7,IFT88,SDC1,BCL2A1,TRPC3,ADC,SFTPA1,FBP1,ECE1,MERTK,FAAH,NRP1,TLR3,RNASEL,NR1H3,IL1R1,MAPKAPK2,TRPV6,NCOA2,FGFR2,PERP,KLF6,CUX1,PFKFB3,TNFRSF18,GLUL,MMP13,MGP,IPO13,MAFB,HSPG2,LGALS3,CFH,HPSE,ANXA2,PDGFA,PKD2,GAB1,TFPI,PTPN6,ZYX,FTH1,CSF1R,EEF1A1,ACSL4,IL16,HSPE1,LTA4H,CD274,C1QA,TRERF1,NPR3,WNT4,IFIH1,GAS6,NCOA1,ADAM33,CHRNA7,LIFR,TLR7,MTHFR,ITGAV,EHF,FIGF,GPRC5A,ADSL,EDN2,UNC5B,C4BPA,SNAI1,CCL1,TNFSF13B,TCIRG1,RGN,OSMR,MRE11A,OGN,CD82,TYMS,MST1,SLURP1,F8,CXADR,CTSS,BCL6,BTK,DOCK2,CD164,BPI,GFRA1,PIK3CD,SPRY2,AGRN,ANXA8L2,SOX4,CD83,RBL2,IRF8,IL2RG,BARX2,XRCC5,LAMC1,CADM1,MGMT,IKZF1,SLA,CCL19,TSC22D3,CNTN1,B2M,CDC20,PRSS21,PDE1A,SCIN,FZR1,MEOX2,MFGE8,CDH11,IRF4,TCF3,DKC1,RGS1,PRKCH,RAD54L,TRAF6,GLI3,PTMA,SOX5,CDC45,ALCAM,ICMT,MTUS1,EPB41L3,STK4,TRPV2,FKBP4,NME1,TERF1,PML,PRKDC,CTCF,RAD50,WFDC1,GZMA,ID3,HOXB3,TFDP1,LIG4,BRD2,HELLS,TAP1,CD81,CCNG1,CD247,Cr11,DIAPH1,DUSP5,ROBO1,SFRP1,SMAD6,ID4,RBM15,NF1,F2RL2,TIAL1,TMPRSS2,GMNN,PIAS1,NCOR1,PTP4A3,HHEX,DPH1,IRF7,MLF1,SMARCA1,TRA@,CDT1,IFNAR1,FCER1G,TPX2,BHLHE40,HEY1,PDE4B,SUZ12,APCDD1,RAD9A, TOP2A,TRAF5,IL20RA,UNG,SH3GL1,LGR4,BARD1,CD3E,FANCL,ALOX5AP,TWIST1,POT1,KLF10,CD74,MYCBP2,ITGB4,ELAC2,FES,FOXO1,POU2AF1,BCAR3,MTAP,LY6E,ZBTB17,CDK10,GAS2,HMGB2,TSC22D1,USP28,AGPAT2,CSF2RA,RAD51C,NOLC1,HDAC4,NR2C2,SMYD3,CUEDC2,PTPRF,ING2,NUMB,MARCKSL1,DAB1,JARID2,ORC2L,RXFP1,FOXG1,KLF11,ZEB1,PTBP2,RUVBL1,PPAP2B,ADAM9,HEXIM1,KPNA2,LGMN,FABP7,TNFRSF21,RAP1GAP,RNASEN,DNAJA3,ATP6V0C,PAQR3,CDCA8,SKP1,LIN9,MID1,NPC1,PLEKH01,CENPH,FBLN1,SDC3,SPAG9,T,CASC1,TASP1,UPF2,TWIST2,HOPX,PTP4A1,RRM1,DBF4,EPHB3,JDP2,SLC16A2,SULF1,SEC14L2,KDM2B,ORC1L,SCPEP1,RAD1,ARID5B,TGIF1,SMC6,ANAPC2,EXOC3,QKI,SAP30,MOBK1A,SLBP,PHLPP1,HYAL1,EGFL7,UNC45B,PIK3IP1,CXXC1,DDX20,AMOT,TIMM44,WSB1,OSGIN1,E4F1,SGK3,CNKSR1,ILF3,GPR39,CLASP2,CDC34,S100A6,SRPK2,PSAP,DYNC1H1,LFNG,MT3,SORBS1,TSPAN1,HIPK3,IGLL1,RRM2,LCP1,AATF,COIL,DPYSL2,PDCD10,HOXB8,LAMA3,ITGB1BP1,ELF3,CREG1,CAPRIN1,ITPR3,IRAK4,L3MBTL2,NELL1,RHOBTB2,ZNF217,CALCOCO2,RBM5,FERMT1,BAMBI,EFEMP1,BTN1A1,TCOF1,SMPD3,RSL1D1,DECR1,ARNTL2,UTP3,WISP3,AKR1B10,UNC119,DHX30,MED23,CHRD1,BCOR,FBXW8,ITGB3BP,VPS36,ATAD2,FIGNL1,RNF128,DNER,CAD,DPYSL3,PIK3C2A,OASL,OSCP1,PHC1,SENP1,RASGRP3,MAGI2,PPP2CA,CIRBP,SLC7A6,FBXO6,SH3BP2,CALM1,CSRNP1,PRIM1,RGS18,LGR5,LRIG3,DUSP11,PDS5A,ODZ1,IQCG,RASGEF1A,WDR3,LYRM1,CDCA4,KIAA1524,AK4,CHERP,PRR5,RPL15,TMEM132A,MACC1,RABL3

5.68E-21

F2, SRC, NPY, ATP2B2, KNG1, MAPK8, TFF3, IL6, MME, CA2, CAPN2, AQP3, ATP2B4, PTGDS, SELP, RB1, MTOR, TF, CAV1, CAMK4, HSP90B1, TACR1, AQP5, HSPA5, DUSP6, COL2A1, BDNF, ALOX5, NTF3, DUSP1, RASD1, CSRP2, NR4A3, UTS2, INSR, IAPP, STX1A, ADORA1, ID1, PPARD, PTGS1, ANK2, FSHR, NRG1, PTH1R, HOMER1, ADORA2A, CNR1, CA9, GADD45B, SKP2, NCOA3, APOD, RARRES2, MMP1, TGFB3, XBP1, PGGT1B, GJB1, LTF, PLCD1, ACE, PRLR, S1PR5, SI, MSI1, STK11, GNAI1, ERP44, LYZ, SFTPA1, ADA, ACTG2, MUC1, FABP3, OXTR, MMP12, SFRP4, CETP, EEF1A1, BMRP2, CYP17A1, GADD45G, PRKAR2B, HDLBP, ENPEP, LTC4S, PDCD1, PRDX4, BECN1, TEC, RHOB, UCHL1, PHB, GAB2, GF11B, MYCN, STEAP3, MKL1, CSF3R, AMD1, TNFRSF6B, PTN, MITF, AMH, GREM1, SMARCD3, PLK3, NID1, PAEP, SNCA, ETV4, DAG1, SOX7, NHLH2, BHLHA15, P2RX5, EPS8, ASNS, FGF19, LMAN1, RDX, NDEL1, MFI2, WDFY2, UAP1, WNT5B, DEFB1, MYST4, NPDC1, TNN, PRDM16, FHL3, NRG2, CRMP1, APLP2, MCF2, CDK8, NRXN1, SEC1, MIP, POU6F1, FZD5, IL1RL1, APBB1IP, CNTN2, DNAJB9, CTHRC1, ZRANB1, MRAS, EMB, ZNF384, RPL10, NAV2, BHLHE23, BAALC, TRIM2, TRIM3, HEXB, DNAJB11, LHX9, MUC5B, C1orf38, KRT20, TFCP2L1, KRT15, DPYSL4, SLC35B2, MTF2

up

1.2064E-06

Differentiation

CEBPB, EGFR, ETV7, GJA1, STMN1, VCAM1, TNFRSF1B, NFKBIA, MMP2, CASP3, CTTN, HIF1A, IGF2, MYC, IGF2R, PXN, KCNQ1, CDH1, GNAI2, NOS2, P2RX7, CD8A, CALD1, PTGS2, PRKCB, FAS, MAPK11, CASP1, ITGB2, APP, CXCR4, CTGF, ST14, CCNE1, PLAU, FOXO1, VTN, PTTG1, CXCL12, P2RY6, ITPR1, APOA1, SPP1, MMP9, CDKN1A, DDIT3, SPI1, BCAR1, CD4, CDK1, EGR1, PLA2G4A, EIF2AK2, CCR2, NDRG1, TNFSF10, C5, BSG, DPP4, TBP, PDCD4, CYBB, JAG1, RAC2, CD36, NOTCH1, CCL4, CHEK2, CDK6, ATR, PTPRC, TLR2, IL15, INHBA, NFE2L2, STAT3, PTPN13, POSTN, CD44, CTSK, CSK, NPM1, ITGA4, LAMA4, RASA1, MDM2, PIK3R1, WNT5A, NPPC, IRF1, GDF9, MLL, BMP2, PRNP, REL, HSD11B1, SOCS1, CTSD, MYD88, COMP, CD38, ANTXR1, SCARB1, CTSB, RORA, PLIN2, DFFB, SREBF1, IL22, F3, CELF2, VCAN, SERPINA1, COL18A1, MMP7, SOCS3, IL4R, PLTP, ID2, FGF1, FRK, MMP1, CDKN2A, AHR, LGALS1, TSC1, C3, IGFBP2, HDAC5, LY96, MCL1, MAPK9, DMBT1, ATRX, FASN, FGFR3, FYN, SMAD7, IFT88, SDC1, BCL2A1, TRPC3, ADC, LIPA, SFTPA1, FBP1, ECE1, FAAH, NRP1, TLR3, RNASEL, STOM, NR1H3, MAPKAPK2, TRPV6, NCOA2, FGFR2, KLF6, CUX1, TNFRSF18, AHSG, GLUL, MMP13, MGP, IPO13, MAFB, HSPG2, LGALS3, CFH, HPSE, ANXA2, PDGFA, PKD2, GAB1, PTPN6, P2RX4, ZYX, FTH1, SLC31A1, CSF1R, EEF1A1, IL16, HSPE1, PNRC1, CD274, C1QA, TRERF1, NPR3, WNT4, GAS6, C3AR1, NCOA1, LIFR, TLR7, ITGAV, EHF, FIGF, GPRC5A, EDN2, GLA, SNAI1, CCL1, TNFSF13B, PDE3B, SLC6A2, RGN, OSMR, TICAM1, OGN, CD82, HSP90AB1, WDR5, MST1, CETN3, SLURP1, F8, CXADR, CTSS, BCL6, BTK, CD164, GFRA1, PIK3CD, SPRY2, AGRN, ANXA8L2, SOX4, CD83, RBL2, IRF8, IL2RG, BARX2, XRCC5, LAMC1, CADM1, MGMT, IKZF1, SLA, CCL19, POLB, DAPK1, TSC22D3, ALDH1A2, CNTN1, B2M, MSH6, CDC20, PRSS21, SCIN, FZR1, MEOX2, CDH11, IRF4, TCF3, RGS1, PRKCH, TRAF6, GLI3, PTMA, MGAT3, SOX5, LCP2, CD79B, ALCAM, MVP, DPCD, MTUS1, FKBP4, NME1, TERF1, PML, PRKDC, CTCF, ID3, HOXB3, TFDP1, BRD2, CD81, CD247, DUSP5, SFRP1, SMAD6, ID4, RBM15, NF1, GMNN, NCOR1, HHEX, IRF7, MLF1, MAP3K8, LIMK2, SMARCA1, TRA@, CDT1, TRIM24, GIMAP5, CD200, BHLHE40, HEY1, SUZ12, DYNLT1, LGR4, CD3E, TWIST1, KLF10, ZNF521, MYCBP2, ITGB4, SH3KBP1, FES, FOXE1, POU2AF1, NBL1, MTAP, LY6E, ZBTB17, CDK10, CAMK2B, GAS2, UGCG, HMGB2, TSC22D1, ULK1, SPAG6, USP18, ST6GAL1, GSG2, CSF2RA, HDAC4, NR2C2, PTPRF, NUMB, DAB1, JARID2, ALDH1A1, FOXG1, KLF11, ZEB1, PTBP2, HEXIM1, KPNA2, FABP7, TNFRSF21, RAP1GAP, KDM3A, PREX1, RNASEN, DNAJA3, PAQR3, IFI27, LIN9, MID1, NPC1, PALB2, HSF2, PLEKHO1, RANBP9, FBLN1, SDC3, T, RHOQ, TLK1, TWIST2, HOPX, KDM6A, CTSL2, ZEB2, ELP2, UNC50, JDP2, SLC16A2, NANOS2, SLC23A2, CDON, ARID5B, TGIF1, QKI, SAP30, NAV3, CXXC1, ATN1, DDX20, OSGIN1, CHD4, SGK3, NET1, S100A6, PSAP, PORCN, LFNG, CTDSPL, LTBP1, MT3, SLC26A8, TSPAN1, HIPK3, IGLL1, DPYSL2, HOXB8, LAMA3, ITGB1BP1, ELF3, TCF7L1, CKB, CREG1, ASAP2, FLNB, SAMSN1, ITPR3, IRAK4, NELL1, PPHLN1, ZNF217, PLB1, GNAL, SMPD3, RNF111, PGD, SYNE2, UNC119, ASAH1, PGS1, FAIM, CHRDL1, SLC38A1, FIGNL1, RNF128, DNER, CEBPZ, ZNF277, DPYSL3, ARL6IP1, PHC1, HECW1, LPAR4, PLEKHB1, HEBP1, PPP2CA, RNPEP, SH3BP2, CLSTN1, MAP3K14, TPPP, SHANK2, ST3GAL5, ATXN10, RGS18, STRN, SPEN, RALGPS1, MBNL3, MYO9A, TBC1D2, IQCG, PITRM1, SFXN3, MAFK, ZMYND8, ZNF503

down

1.84E-14
